# Supplementary material
Source: PubMed Central journal article supplement (PMC2950440)
Supplement: supp_76_19_6351__1.pdf [file supp_76_19_6351__1.pdf]

Table S1. Primers used in this study.

| Primer     | Oligonucleotide sequence (5'→3')               |
|------------|------------------------------------------------|
| SAM1-FW    | AAAACCCGGGGCACAGGAAGAACACGTATC                 |
| SAM1-RV    | TTTTCCCGGGCGATAGCGTAAACGAAGAAG                 |
| MUP1-FW    | AAAACCCGGGGTCGGCGACAACTAGAAG                   |
| MUP1-RV    | TTTTCCCGGGGAAGACAGCATCGTATTGT                  |
| L123M-FW   | ACCAATTGCAATCTTACATTTGTTTCTGTATGCCAGCTTTTGAAG  |
| L123M-RV   | CTTCGAAAGCTGGCATAACAGAAACAAATGTAAGATTGCAATTGGT |
| aFactor-ER | GGAATTCATGAGATTTCTTCAATTTTTACTG                |
| MET3p-FW   | GCCCTTTTCCAAGATGATGA                           |
| MET3p-RV   | AACAATGAAGTGGGAGGCAC                           |
| MET14p-FW  | ACGCAAGGCATTGAGAAAAC                           |
| MET14p-RV  | GCTTCATATGGGGCAGAAAT                           |
| MET17p-FW  | GGTTCGCAATTGTTTGGTCT                           |
| MET17p-RV  | ACAGAAGTAACCACCGGCAC                           |
| ACT1p-FW   | CGTCCAATTTACGCTGGTT                            |
| ACT1p-RV   | CGGTGATTTCTTTTGCATT                            |

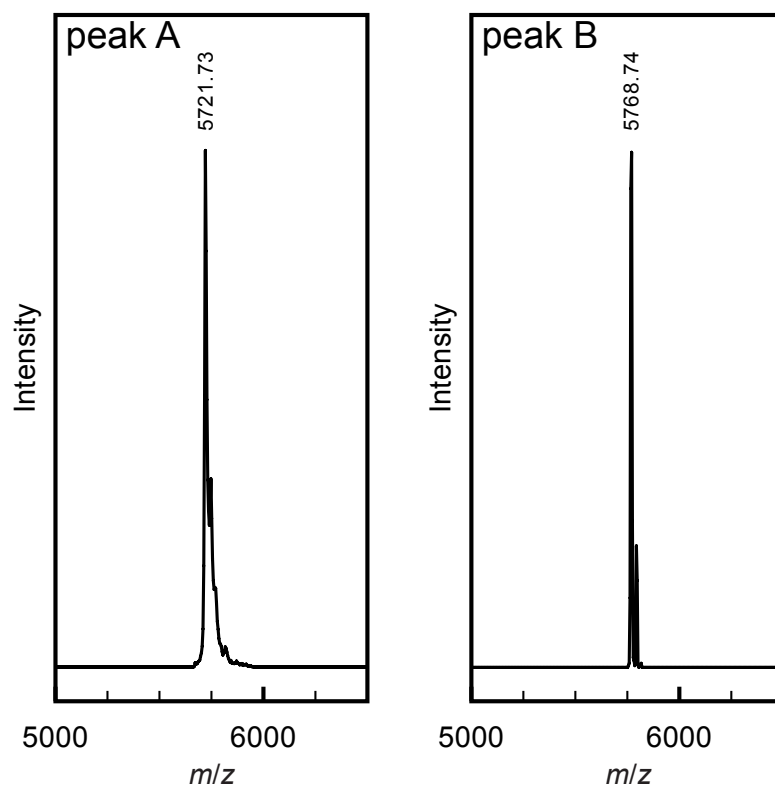

Fig. S1. Mass spectra of the Met and SeMet derivatives of the L123M EGF peptide. The eluates from reverse phase chromatography (Fig. 6, chromatogram No. 2 of SRY5-7) were analyzed by MALDI-TOF mass spectrometry as described in Materials and Methods. The average mass values of peak A (observed  $m/z$  5721.73, left panel) and peak B (observed  $m/z$  5768.74, right panel) corresponded closely to the L123M EGF peptide containing Met (theoretical  $m/z$  5722.20) and SeMet (theoretical  $m/z$  5769.11), respectively. Note that replacement of sulfur by selenium increases the mass value by 47.

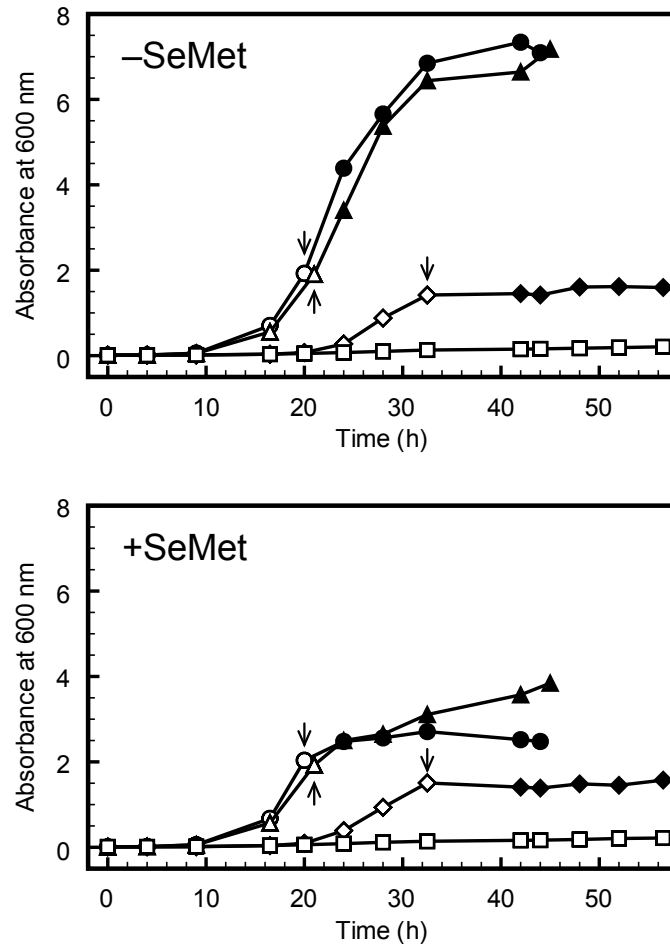

Fig. S2. Growth curves of yeast strains when induced the expression of recombinant L123M EGF peptide. The wild-type (circles), SRY5-7 (triangles), *sam1Δ sam2Δ* (diamonds), and *cys3Δ* (squares) strains harboring the plasmid pGAL-123M were cultured as described in Materials and Methods. To induce the L123M peptide expression, galactose was added to give a final concentration of 2% at the time points shown by arrows, and then the peptides were overexpressed in the absence (upper panel) or presence (lower panel) of 0.25 mM SeMet for 24 h. The OD<sub>600</sub> values of cells before (open symbols) or after (closed symbols) addition of galactose are plotted.
